# Supplementary material for: Mps1 promotes poleward chromosome movements in meiotic pro-metaphase
Source: bioRxiv or medRxiv preprint supplement (doi:10.1101/2020.06.28.176370), 2020-08-05
Supplement: Supplementary file [file media-1.pdf]

SUPPLEMENTAL MATERIALS (Meyer et al.)

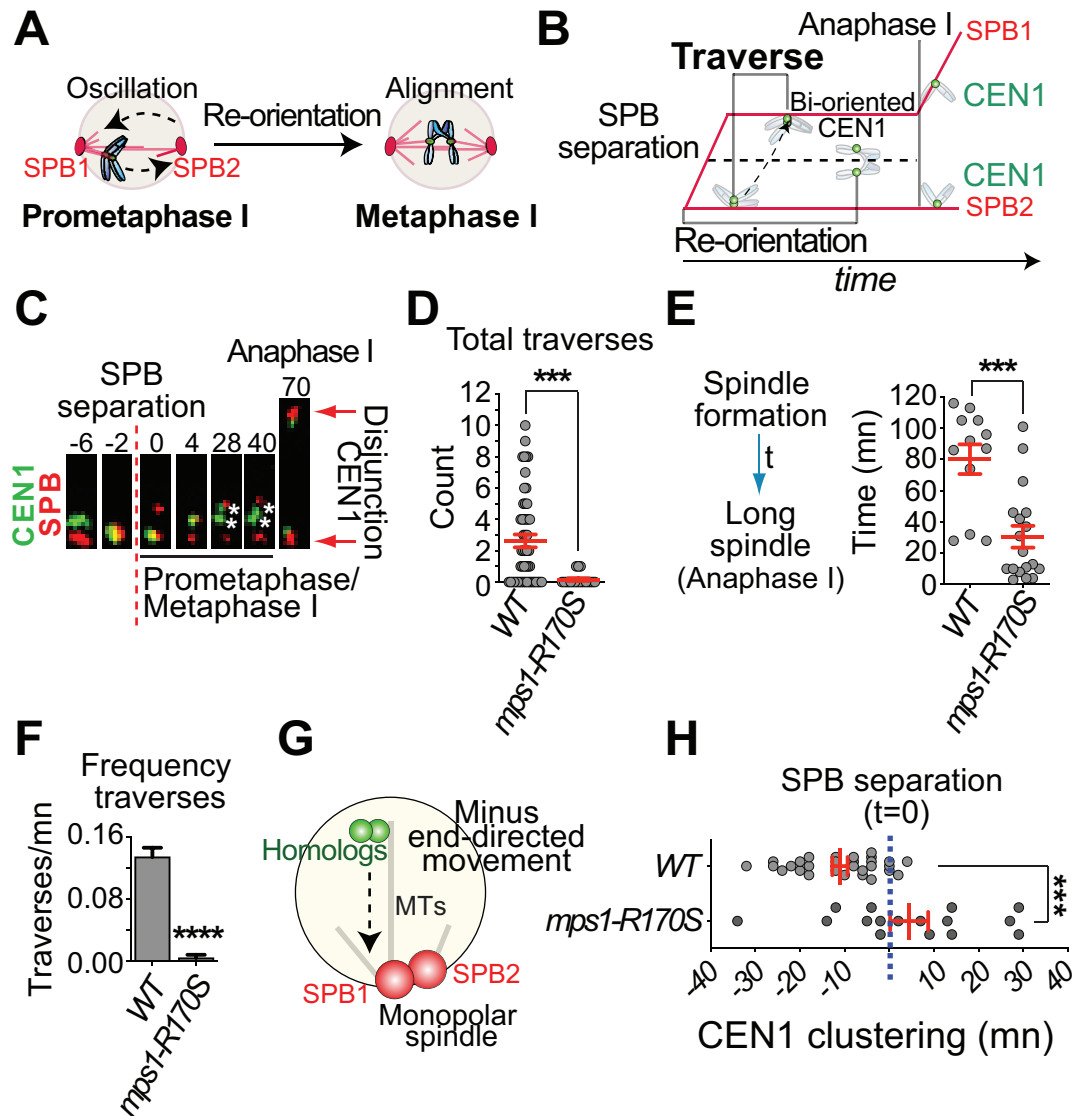

**Figure S1. Mps1 is required for the bi-orientation of bivalents in meiosis. A.**

Cartoon illustrating the process of re-orientation and chromosome alignment. The vast majority of chromosome pairs initially attach to one spindle pole in early prometaphase I, thus the re-orientation process is a necessary step to promote the establishment of bi-oriented attachments for each chromosome pair. **B.** The re-orientation process can be quantified by counting the number of traverses (movements across the entire spindle).

For simplicity only *CEN1* is represented. **C-H** Strains evaluated were all diploids carrying GFP-tagged centromeres of chromosome *I* (*CEN1-GFP*) and expressing *SPC42-DsRed* to mark the SPBs. Cells were sporulated and released from a pachytene arrest (*P<sub>GAL1</sub>-NDT80*, *GAL4-ER*) at 6 hours after meiotic induction by the addition of 5  $\mu$ M  $\beta$ -estradiol. The diploid cells were observed by time-lapse imaging during meiosis at two-minute intervals for 3-4 hours. **C.** Representative cell from wild-type is shown. The asterisks indicate split homologous centromeres. Diploid cells (wild-type and *mps1-R170S* mutants) that were able to form bivalents (*SPO11*) were analyzed for the following parameters: **D.** The total number of traverses until bi-orientation or until anaphase I (in cases where bi-orientation of chromosome *I* was not achieved) was determined for each cell. **E.** The duration of metaphase I was determined for each individual cell ( $n \geq 18$ ) by calculating the time between SPB separation and the formation of a long bipolar spindle ( $\geq 3.5 \mu$ m). The shortened metaphase in *mps1-R170S* mutants highlights their loss of the spindle assembly checkpoint. **F.** The frequency of *CEN1* traverses per minute during the first twenty minutes of prometaphase (marked by the separation of SPBs) is represented. **G.** Schematic representation of the process of chromosome movement on a monopolar spindle which occurs before bipolar spindle formation. **H.** The timing of the final *CEN1* clustering (when *CEN1* reaches the SPB and remains associated with it) was monitored relative to the moment of SPB separation for each individual cell of the indicated genotypes ( $n \geq 19$ ). The red dotted line represents the time of SPB separation. \*\*\* $p < 0.001$ , \*\*\*\* $p < 0.0001$  (student's t test).

**Table S1: Diploid strain list**

| <b>Diploid</b>      | <b>Parents strain</b> | <b>Figure</b>                                                                                    |
|---------------------|-----------------------|--------------------------------------------------------------------------------------------------|
| DRM3032             | X1151 * Y1114         | Fig. 2, 3 “ <i>WT</i> ”                                                                          |
| DRM2417             | X1195 * Y1144         | Fig. 2, 3 “ <i>mps1-R170S</i> ”                                                                  |
| DRM1658             | X1195 * Y1147         | Fig. 2, 3 “ <i>mps1-as1</i> ”                                                                    |
| DRM1661             | X1197 * Y1148         | Fig. 2, 3 “ <i>mps1-as1</i> ”                                                                    |
| DRM3107             | X2297 * Y2145         | Fig. 3 “ <i>ndc80-md</i> ”                                                                       |
| DRM2549             | X1151 * Y2083         | Fig. 4, 5 “ <i>WT</i> ”                                                                          |
| DRM2550             | X1152 * Y2083         | Fig. 4, 5 “ <i>WT</i> ”                                                                          |
| DRM2525             | X1196 * Y2099         | Fig. 4, 5 “ <i>mps1-R170S</i> ”                                                                  |
| DRM2526             | X1197 * Y2100         | Fig. 4, 5 “ <i>mps1-R170S</i> ”                                                                  |
| DRM2551             | X1196 * Y2091         | Fig. 4, 5 “ <i>mps1-R170S</i> ”                                                                  |
| DRM2552             | X1197 * Y2092         | Fig. 4, 5 “ <i>mps1-R170S</i> ”                                                                  |
| DRM2649             | X2297 * Y2187         | Fig. 4 “ <i>ndc80-md</i> ”                                                                       |
| DRM2650             | X2298 * Y2188         | Fig. 4 “ <i>ndc80-md</i> ”                                                                       |
| DRM3558/<br>DRM3784 | X3217 * Y2771         | Fig. 6 “Mitotic ( <i>WT</i> Diploid)”                                                            |
| <u>DRM3451</u>      | X3227 * Y2779         | Fig. 6, S2B “Meiotic ( <i>WT</i> Diploid)”, “ <i>WT (1-NMPP1)</i> ”, “ <i>WT (metaphase)</i> ”   |
| <u>DRM3452</u>      | X3228 * Y2780         | Fig. 6, S2B “Meiotic ( <i>WT</i> Diploid)”, “ <i>WT (1-NMPP1)</i> ”, “ <i>WT (metaphase)</i> ”   |
| DRM3455             | X3233 * Y2783         | Fig. 6, S2B “ <i>mps1-as1 (1-NMPP1)</i> ”                                                        |
| DRM3456             | X3234 * Y2784         | Fig. 6, S2B “ <i>mps1-as1 (1-NMPP1)</i> ”                                                        |
| DRM3457             | X3231 * Y2781         | Fig. 6, S2B “ <i>spo11 (prometaphase)</i> ”, “ <i>spo11 WT (1-NMPP1)</i> ”, “ <i>spo11 WT</i> ”  |
| DRM3458             | X3232 * Y2782         | Fig. 6, S2B “ <i>spo11 (prometaphase)</i> ”, “ <i>spo11 WT (1-NMPP1)</i> ”, “ <i>spo11 WT</i> ”, |
| DRM3459             | X3229 * Y2787         | Fig. 6, S2B “ <i>spo11 mps1-R170S</i> ”                                                          |
| DRM3460             | X3230 * Y2787         | Fig. 6, S2B “ <i>spo11 mps1-R170S</i> ”                                                          |
| DRM3479             | X3229 * Y2805         | Fig. 6, S2B “ <i>spo11 mps1-as1 (1-NMPP1)</i> ”                                                  |
| DRM3480             | X3230 * Y2805         | Fig. 6, S2B “ <i>spo11 mps1-as1 (1-NMPP1)</i> ”                                                  |
| DRM3893             | X3383 * Y2933         | Fig. 6, S2B “ <i>STU2-AID*</i> ”, “ <i>STU2-AID* (+Auxin)</i> ”                                  |
| DRM3894             | X3384 * Y2934         | Fig. 6, S2B “ <i>STU2-AID*</i> ”, “ <i>STU2-AID* (+Auxin)</i> ”                                  |
| DRM2405             | X1843 * Y1693         | Fig. S1 “ <i>WT</i> ”                                                                            |
| DRM2415             | X1142 * Y1136         | Fig. S1 “ <i>mps1-R170S</i> ”                                                                    |
| DRM1967             | X1103 * Y1092         | Fig. S2A “ <i>WT</i> ”                                                                           |
| DRM1969             | X1142 * Y1124         | Fig. S2A “ <i>mps1-as1</i> ”                                                                     |

**Table S2: Haploid strain list**

|       |                                                                                                                                                                                                                                          |
|-------|------------------------------------------------------------------------------------------------------------------------------------------------------------------------------------------------------------------------------------------|
| X1843 | <i>MATa, trp1-Δ63, his3-Δ1, leu2, met13-d, tyr1-1, lys2::pLL1[PCYC1-GFP-lacI LYS2], can1-R, ura3::pKB80 [PGPD1-GAL4(848)-ER-URA3::hphNT1], natNT2-PGAL1-NDT80, CEN1::pJN2[lacO256 LEU2]</i>                                              |
| Y1693 | <i>MATα, ura3::pAFS152[URA3 PCYC-GFP-lacI], trp1-Δ63, his3-Δ1, leu2, lys2::pMDE798[PDMC1-GFP-lacI], tyr1-2, met13-c, cyh2-1, SPC42-[MDE1145: URA3 SPC42-DSRed], natNT2-PGAL1-NDT80, CEN1::pJN2[lacO256 LEU2]</i>                         |
| X1142 | <i>MATa, ura3::pKB80 [PGPD1-GAL4(848)-ER-URA3::hphNT1], trp1-63, his3-1, leu2, met13-d, tyr1-1, lys2::pLL1[PCYC1-GFP-lacI LYS2], can1®, ZIP1-TEV?, KanMX-PGAL1-NDT80, PCLB2-3HA-MPS1 KANMX6, CEN1::pJN2[lacO256 LEU2]</i>                |
| Y1136 | <i>MATα, ura3::pAFS152[URA3 PCYC-GFP-lacI], trp1-Δ63, his3-Δ1, leu2, lys2::pMDE798[PDMC1-GFP-lacI], tyr1-2, met13-c, cyh2-1, SPC42-[MDE1145: URA3 SPC42-DSRed], KanMX-PGAL1-NDT80, mps1-R170S::his5, CEN1::pJN2[lacO256 LEU2]</i>        |
| X1151 | <i>MATα, ura3::pKB80 [PGPD1-GAL4(848)-ER-URA3::hphNT1], trp1-63, his3-1, leu2, met13-d, tyr1-1, lys2::pLL1[PCYC1-GFP-lacI LYS2], can1®, ZIP1-TEV?, KanMX-PGAL1-NDT80, CEN1::pJN2[lacO256 LEU2], spo11::KANMX</i>                         |
| Y1114 | <i>MATa, ura3::pAFS152[URA3 PCYC-GFP-lacI], trp1-Δ63, his3-Δ1, leu2, lys2::pMDE798[PDMC1-GFP-lacI], tyr1-2, met13-c, cyh2-1, SPC42-[MDE1145: URA3 SPC42-DSRed], KanMX-PGAL1-NDT80, spo11::KANMX</i>                                      |
| X1195 | <i>MATa, ura3::pKB80 [PGPD1-GAL4(848)-ER-URA3::hphNT1], trp1-63, his3-1, leu2, met13-d, tyr1-1, lys2::pLL1[PCYC1-GFP-lacI LYS2], can1®, ZIP1-TEV?, KanMX-PGAL1-NDT80, spo11::KANMX, PCLB2-3HA-MPS1 KANMX6, CEN1::pJN2[lacO256 LEU2]</i>  |
| Y1144 | <i>MATα, ura3::pAFS152[URA3 PCYC-GFP-lacI], trp1-Δ63, his3-Δ1, leu2, lys2::pMDE798[PDMC1-GFP-lacI], tyr1-2, met13-c, cyh2-1, SPC42-[MDE1145: URA3 SPC42-DSRed], KanMX-PGAL1-NDT80, spo11::KANMX, mps1-R170S::his5</i>                    |
| Y1147 | <i>MATα, ura3::pAFS152[URA3 PCYC-GFP-lacI], trp1-Δ63, his3-Δ1, leu2, lys2::pMDE798[PDMC1-GFP-lacI], tyr1-2, met13-c, cyh2-1, SPC42-[MDE1145: URA3 SPC42-DSRed], KanMX-PGAL1-NDT80, spo11::KANMX, mps1Δ::KANMX, TRP1::10Xmyc-mps1-as1</i> |
| X1197 | <i>MATα, ura3::pKB80 [PGPD1-GAL4(848)-ER-URA3::hphNT1], trp1-63, his3-1, leu2, met13-d, tyr1-1, lys2::pLL1[PCYC1-GFP-lacI LYS2], can1®, ZIP1-TEV?, KanMX-PGAL1-NDT80, spo11::KANMX, PCLB2-3HA-MPS1 KANMX6, CEN1::pJN2[lacO256 LEU2]</i>  |
| Y1148 | <i>MATa, ura3::pAFS152[URA3 PCYC-GFP-lacI], trp1-Δ63, his3-Δ1, leu2, lys2::pMDE798[PDMC1-GFP-lacI], tyr1-2, met13-c, cyh2-1, SPC42-[MDE1145: URA3 SPC42-DSRed], KanMX-PGAL1-NDT80, spo11::KANMX, mps1Δ::KANMX, TRP1::10Xmyc-mps1-as1</i> |
| X2297 | <i>MATa, trp1-Δ63, his3-Δ1, leu2, met13-d, tyr1-1, lys2::pLL1[PCYC1-GFP-lacI LYS2], can1-R, ura3::pKB80 [PGPD1-GAL4(848)-ER-URA3::hphNT1], natNT2-PGAL1-NDT80, CEN1::pJN2[lacO256 LEU2], PCLB2-3HA-NDC80 KanMX6, spo11::HIS3MX6</i>      |
| Y2145 | <i>MATα, ura3::pAFS152[URA3 PCYC-GFP-lacI], trp1-Δ63, his3-Δ1, leu2, lys2::pMDE798[PDMC1-GFP-lacI], tyr1-2, met13-c, cyh2-1, SPC42-[MDE1145: URA3 SPC42-DSRed], natNT2-PGAL1-NDT80, PCLB2-3HA-NDC80 KanMX6, spo11::HIS3MX6</i>           |
| Y2083 | <i>MATa, trp1-Δ63, his3-Δ1, leu2, lys2::pLL1[PCYC1-GFP-lacI LYS2], tyr1-2, met13-c, cyh2-1, ura3::pAFS152[URA3 PCYC1-GFP-lacI], SPC42-GFP-TRP1, natNT2-PGAL1-NDT80, spo11::KANMX</i>                                                     |
| X1152 | <i>MATα, ura3::pKB80 [PGPD1-GAL4(848)-ER-URA3::hphNT1], trp1-63, his3-1, leu2, met13-d, tyr1-1, lys2::pLL1[PCYC1-GFP-lacI LYS2], can1®, ZIP1-TEV?, KanMX-PGAL1-NDT80, CEN1::pJN2[lacO256 LEU2], spo11::KANMX</i>                         |

|       |                                                                                                                                                                                                                                                                                                                                                                                           |
|-------|-------------------------------------------------------------------------------------------------------------------------------------------------------------------------------------------------------------------------------------------------------------------------------------------------------------------------------------------------------------------------------------------|
| X1196 | <i>MAT<math>\alpha</math></i> , <i>ura3::pKB80 [PGPD1-GAL4(848)-ER-URA3::hphNT1]</i> , <i>trp1-63</i> , <i>his3-1</i> , <i>leu2</i> , <i>met13-d</i> , <i>tyr1-1</i> , <i>lys2::pLL1[PCYC1-GFP-lacI LYS2]</i> , <i>can1</i> ®, <i>ZIP1-TEV?</i> , <i>KanMX-P<sub>GALI</sub>-NDT80</i> , <i>spo11::KANMX</i> , <i>PCLB2-3HA-MPS1 KANMX6</i> , <i>CEN1::pJN2[lacO256 LEU2]</i>              |
| Y2099 | <i>MAT<math>\alpha</math></i> , <i>ura3::pAFS152[URA3 PCYC-GFP-lacI]</i> , <i>trp1-<math>\Delta</math>63</i> , <i>his3-<math>\Delta</math>1</i> , <i>leu2</i> , <i>lys2::pMDE798[PDMC1-GFP-lacI]</i> , <i>tyr1-2</i> , <i>met13-c</i> , <i>cyh2-1</i> , <i>SPC42-GFP-TRP1</i> , <i>spo11::HIS3MX6</i> , <i>natNT2-PGAL1-NDT80</i> , <i>mps1-R170S::his5</i>                               |
| Y2100 | <i>MAT<math>\alpha</math></i> , <i>ura3::pAFS152[URA3 PCYC-GFP-lacI]</i> , <i>trp1-<math>\Delta</math>63</i> , <i>his3-<math>\Delta</math>1</i> , <i>leu2</i> , <i>lys2::pMDE798[PDMC1-GFP-lacI]</i> , <i>tyr1-2</i> , <i>met13-c</i> , <i>cyh2-1</i> , <i>SPC42-GFP-TRP1</i> , <i>spo11::HIS3MX6</i> , <i>natNT2-PGAL1-NDT80</i> , <i>mps1-R170S::his5</i>                               |
| Y2091 | <i>MAT<math>\alpha</math></i> , <i>trp1-<math>\Delta</math>63</i> , <i>his3-<math>\Delta</math>1</i> , <i>leu2</i> , <i>lys2::pLL1[PCYC1-GFP-lacI LYS2]</i> , <i>tyr1-2</i> , <i>met13-c</i> , <i>cyh2-1</i> , <i>ura3::pAFS152[URA3 PCYC1-GFP-lacI]</i> , <i>SPC42-GFP-TRP1</i> , <i>natNT2-PGAL1-NDT80</i> , <i>spo11::KANMX</i> , <i>mps1-R170S::his5</i>                              |
| Y2092 | <i>MAT<math>\alpha</math></i> , <i>trp1-<math>\Delta</math>63</i> , <i>his3-<math>\Delta</math>1</i> , <i>leu2</i> , <i>lys2::pLL1[PCYC1-GFP-lacI LYS2]</i> , <i>tyr1-2</i> , <i>met13-c</i> , <i>cyh2-1</i> , <i>ura3::pAFS152[URA3 PCYC1-GFP-lacI]</i> , <i>SPC42-GFP-TRP1</i> , <i>natNT2-PGAL1-NDT80</i> , <i>spo11::KANMX</i> , <i>mps1-R170S::his5</i>                              |
| Y2187 | <i>MAT<math>\alpha</math></i> , <i>ura3::pAFS152[URA3 PCYC-GFP-lacI]</i> , <i>trp1-<math>\Delta</math>63</i> , <i>his3-<math>\Delta</math>1</i> , <i>leu2</i> , <i>lys2::pMDE798[PDMC1-GFP-lacI]</i> , <i>tyr1-2</i> , <i>met13-c</i> , <i>cyh2-1</i> , <i>SPC42-GFP-TRP1</i> , <i>natNT2-PGAL1-NDT80</i> , <i>PCLB2-3HA-NDC80 KanMX6</i> , <i>spo11::HIS3MX6</i>                         |
| X2298 | <i>MAT<math>\alpha</math></i> , <i>trp1-<math>\Delta</math>63</i> , <i>his3-<math>\Delta</math>1</i> , <i>leu2</i> , <i>met13-d</i> , <i>tyr1-1</i> , <i>lys2::pLL1[PCYC1-GFP-lacI LYS2]</i> , <i>can1-R</i> , <i>ura3::pKB80 [PGPD1-GAL4(848)-ER-URA3::hphNT1]</i> , <i>natNT2-PGAL1-NDT80</i> , <i>CEN1::pJN2[lacO256 LEU2]</i> , <i>PCLB2-3HA-NDC80 KanMX6</i> , <i>spo11::HIS3MX6</i> |
| Y2188 | <i>MAT<math>\alpha</math></i> , <i>ura3::pAFS152[URA3 PCYC-GFP-lacI]</i> , <i>trp1-<math>\Delta</math>63</i> , <i>his3-<math>\Delta</math>1</i> , <i>leu2</i> , <i>lys2::pMDE798[PDMC1-GFP-lacI]</i> , <i>tyr1-2</i> , <i>met13-c</i> , <i>cyh2-1</i> , <i>SPC42-GFP-TRP1</i> , <i>natNT2-PGAL1-NDT80</i> , <i>PCLB2-3HA-NDC80 KanMX6</i> , <i>spo11::HIS3MX6</i>                         |
| X3217 | <i>MAT<math>\alpha</math></i> , <i>ura3-13</i> , <i>trp1-<math>\Delta</math>63</i> , <i>his3-<math>\Delta</math>1</i> , <i>leu2-?</i> , <i>met13-d</i> , <i>tyr1-1</i> , <i>lys2-1</i> , <i>can1-R</i> , <i>TUB1-OPL447[pHIS3p:mEos2-Tub1+3'UTR::TRP1]</i>                                                                                                                                |
| Y2771 | <i>MAT<math>\alpha</math></i> , <i>leu2-?</i> , <i>lys2-2</i> , <i>met13-c</i> , <i>tyr1-2</i> , <i>ura3-1</i> , <i>trp1-<math>\Delta</math>63</i> , <i>cyh2-1</i> , <i>his3-<math>\Delta</math>1</i> , <i>TUB1-OPL447[pHIS3p:mEos2-Tub1+3'UTR::TRP1]</i>                                                                                                                                 |
| X3227 | <i>MAT<math>\alpha</math></i> , <i>ura3::pKB80 [PGPD1-GAL4(848)-ER-URA3::hphNT1]</i> , <i>trp1-<math>\Delta</math>63</i> , <i>his3-<math>\Delta</math>1</i> , <i>leu2-?</i> , <i>met13-d</i> , <i>tyr1-1</i> , <i>lys2-1</i> , <i>can1-R</i> , <i>TUB1-OPL447[pHIS3p:mEos2-Tub1+3'UTR::TRP1]</i> , <i>natNT2-PGAL1-NDT80</i>                                                              |
| Y2779 | <i>MAT<math>\alpha</math></i> , <i>leu2-?</i> , <i>lys2-2</i> , <i>met13-c</i> , <i>tyr1-2</i> , <i>ura3-1</i> , <i>trp1-<math>\Delta</math>63</i> , <i>cyh2-1</i> , <i>his3-<math>\Delta</math>1</i> , <i>TUB1-OPL447[pHIS3p:mEos2-Tub1+3'UTR::TRP1]</i> , <i>natNT2-PGAL1-NDT80</i>                                                                                                     |
| X3228 | <i>MAT<math>\alpha</math></i> , <i>ura3::pKB80 [PGPD1-GAL4(848)-ER-URA3::hphNT1]</i> , <i>trp1-<math>\Delta</math>63</i> , <i>his3-<math>\Delta</math>1</i> , <i>leu2-?</i> , <i>met13-d</i> , <i>tyr1-1</i> , <i>lys2-1</i> , <i>can1-R</i> , <i>TUB1-OPL447[pHIS3p:mEos2-Tub1+3'UTR::TRP1]</i> , <i>natNT2-PGAL1-NDT80</i>                                                              |
| Y2780 | <i>MAT<math>\alpha</math></i> , <i>leu2-?</i> , <i>lys2-2</i> , <i>met13-c</i> , <i>tyr1-2</i> , <i>ura3-1</i> , <i>trp1-<math>\Delta</math>63</i> , <i>cyh2-1</i> , <i>his3-<math>\Delta</math>1</i> , <i>TUB1-OPL447[pHIS3p:mEos2-Tub1+3'UTR::TRP1]</i> , <i>natNT2-PGAL1-NDT80</i>                                                                                                     |
| X3233 | <i>MAT<math>\alpha</math></i> , <i>ura3::pKB80 [PGPD1-GAL4(848)-ER-URA3::hphNT1]</i> , <i>trp1-<math>\Delta</math>63</i> , <i>his3-<math>\Delta</math>1</i> , <i>leu2-?</i> , <i>met13-d</i> , <i>tyr1-1</i> , <i>lys2-1</i> , <i>can1-R</i> , <i>TUB1-OPL447[pHIS3p:mEos2-Tub1+3'UTR::TRP1]</i> , <i>natNT2-PGAL1-NDT80</i> , <i>PCLB2-3HA-MPS1 KANMX6</i>                               |
| Y2783 | <i>MAT<math>\alpha</math></i> , <i>leu2-?</i> , <i>lys2-2</i> , <i>met13-c</i> , <i>tyr1-2</i> , <i>ura3-1</i> , <i>trp1-<math>\Delta</math>63</i> , <i>cyh2-1</i> , <i>his3-<math>\Delta</math>1</i> , <i>TUB1-OPL447[pHIS3p:mEos2-Tub1+3'UTR::TRP1]</i> , <i>natNT2-PGAL1-NDT80</i> , <i>mps1<math>\Delta</math>::KANMX</i> , <i>TRP1::10Xmyc-mps1-as1</i>                              |
| X3234 | <i>MAT<math>\alpha</math></i> , <i>ura3::pKB80 [PGPD1-GAL4(848)-ER-URA3::hphNT1]</i> , <i>trp1-<math>\Delta</math>63</i> , <i>his3-<math>\Delta</math>1</i> , <i>leu2-?</i> , <i>met13-d</i> , <i>tyr1-1</i> , <i>lys2-1</i> , <i>can1-R</i> , <i>TUB1-OPL447[pHIS3p:mEos2-Tub1+3'UTR::TRP1]</i> , <i>natNT2-PGAL1-NDT80</i> , <i>PCLB2-3HA-MPS1 KANMX6</i>                               |
| Y2784 | <i>MAT<math>\alpha</math></i> , <i>leu2-?</i> , <i>lys2-2</i> , <i>met13-c</i> , <i>tyr1-2</i> , <i>ura3-1</i> , <i>trp1-<math>\Delta</math>63</i> , <i>cyh2-1</i> , <i>his3-<math>\Delta</math>1</i> , <i>TUB1-OPL447[pHIS3p:mEos2-Tub1+3'UTR::TRP1]</i> , <i>natNT2-PGAL1-NDT80</i> , <i>mps1<math>\Delta</math>::KANMX</i> , <i>TRP1::10Xmyc-mps1-as1</i>                              |

|       |                                                                                                                                                                                                                                                      |
|-------|------------------------------------------------------------------------------------------------------------------------------------------------------------------------------------------------------------------------------------------------------|
| X3231 | <i>MATa, ura3::pKB80 [PGPD1-GAL4(848)-ER-URA3::hphNT1], trp1-Δ63, his3-Δ1, leu2-?, met13-d, tyr1-1, lys2-1, can1-R, TUB1-OPL447[pHIS3p:mEos2-Tub1+3'UTR::TRP1], natNT2-PGAL1-NDT80, spo11::KANMX</i>                                                 |
| Y2781 | <i>MATα, leu2-?, lys2-2, met13-c, tyr1-2, ura3-1, trp1-Δ63, cyh2-1, his3-Δ1, TUB1-OPL447[pHIS3p:mEos2-Tub1+3'UTR::TRP1], natNT2-PGAL1-NDT80, spo11::KANMX</i>                                                                                        |
| X3232 | <i>MATα, ura3::pKB80 [PGPD1-GAL4(848)-ER-URA3::hphNT1], trp1-Δ63, his3-Δ1, leu2-?, met13-d, tyr1-1, lys2-1, can1-R, TUB1-OPL447[pHIS3p:mEos2-Tub1+3'UTR::TRP1], natNT2-PGAL1-NDT80, spo11::KANMX</i>                                                 |
| Y2782 | <i>MATa, leu2-?, lys2-2, met13-c, tyr1-2, ura3-1, trp1-Δ63, cyh2-1, his3-Δ1, TUB1-OPL447[pHIS3p:mEos2-Tub1+3'UTR::TRP1], natNT2-PGAL1-NDT80, spo11::KANMX</i>                                                                                        |
| X3229 | <i>MATa, ura3::pKB80 [PGPD1-GAL4(848)-ER-URA3::hphNT1], trp1-Δ63, his3-Δ1, leu2-?, met13-d, tyr1-1, lys2-1, can1-R, TUB1-OPL447[pHIS3p:mEos2-Tub1+3'UTR::TRP1], natNT2-PGAL1-NDT80, spo11::KANMX, PCLB2-3HA-MPS1 KANMX6</i>                          |
| Y2787 | <i>MATα, leu2-?, lys2-2, met13-c, tyr1-2, ura3-1, trp1-Δ63, cyh2-1, his3-Δ1, TUB1-OPL447[pHIS3p:mEos2-Tub1+3'UTR::TRP1], natNT2-PGAL1-NDT80, spo11::KANMX, mps1-R170S::his5</i>                                                                      |
| X3230 | <i>MATa, ura3::pKB80 [PGPD1-GAL4(848)-ER-URA3::hphNT1], trp1-Δ63, his3-Δ1, leu2-?, met13-d, tyr1-1, lys2-1, can1-R, TUB1-OPL447[pHIS3p:mEos2-Tub1+3'UTR::TRP1], natNT2-PGAL1-NDT80, spo11::KANMX, PCLB2-3HA-MPS1 KANMX6</i>                          |
| Y2805 | <i>MATα, leu2-?, lys2-2, met13-c, tyr1-2, ura3-1, trp1-Δ63, cyh2-1, his3-Δ1, TUB1-OPL447[pHIS3p:mEos2-Tub1+3'UTR::TRP1], natNT2-PGAL1-NDT80, mps1Δ::KANMX, TRP1::10Xmyc-mps1-as1, spo11::KANMX</i>                                                   |
| X3383 | <i>MATa, trp1-Δ63, his3-Δ1, leu2-?, met13-d, tyr1::[HIS5 pCUP1-AFB2], lys2-1, can1-R, STU2-AID*-9xMYC-HIS3MX6, ura3::pKB80 [PGPD1-GAL4(848)-ER-URA3::hphNT1], natNT2-PGAL1-NDT80, TUB1-OPL447[pHIS3p:mEos2-Tub1+3'UTR::TRP1]</i>                     |
| Y2933 | <i>MATα, leu2-?, lys2-2, met13-c, tyr1::[HIS5 pCUP1-AFB2], ura3-1, trp1-Δ63, cyh2-1, his3-Δ1, STU2-AID*-9xMYC-HIS3MX6, natNT2-PGAL1-NDT80, TUB1-OPL447[pHIS3p:mEos2-Tub1+3'UTR::TRP1]</i>                                                            |
| X3384 | <i>MATα, trp1-Δ63, his3-Δ1, leu2-?, met13-d, tyr1::[HIS5 pCUP1-AFB2], lys2-1, can1-R, STU2-AID*-9xMYC-HIS3MX6, ura3::pKB80 [PGPD1-GAL4(848)-ER-URA3::hphNT1], natNT2-PGAL1-NDT80, TUB1-OPL447[pHIS3p:mEos2-Tub1+3'UTR::TRP1]</i>                     |
| Y2934 | <i>MATa, leu2-?, lys2-2, met13-c, tyr1::[HIS5 pCUP1-AFB2], ura3-1, trp1-Δ63, cyh2-1, his3-Δ1, STU2-AID*-9xMYC-HIS3MX6, natNT2-PGAL1-NDT80, TUB1-OPL447[pHIS3p:mEos2-Tub1+3'UTR::TRP1]</i>                                                            |
| X1103 | <i>MATa, URA3::pKB80 [PGPD1-GAL4(848)-ER-URA3::hphNT1], trp1-63, his3-1, leu2, met13-d, tyr1-1, lys2::pLL1[PCYCI-GFP-lacI LYS2], can1 (R), ZIP1-TEV?, KanMX-PGAL1-NDT80, CEN1::pJN2[lacO256 LEU2]</i>                                                |
| Y1092 | <i>MATα, ura3::pAFS152[URA3 PCYC-GFP-lacI], trp1-Δ63, his3-Δ1, leu2, lys2::pMDE798[PDMC1-GFP-lacI], tyr1-2, met13-c, cyh2-1, SPC42-[MDE1145: URA3 SPC42-DSRed], KanMX-PGAL1-NDT80, CEN1::pJN2[lacO256 LEU2]</i>                                      |
| Y1124 | <i>MATα, ura3::pAFS152[URA3 PCYC-GFP-lacI], trp1-Δ63, his3-Δ1, leu2, lys2::pMDE798[PDMC1-GFP-lacI], tyr1-2, met13-c, cyh2-1, SPC42-[MDE1145: URA3 SPC42-DSRed], KanMX-PGAL1-NDT80, CEN1::pJN2[lacO256 LEU2], mps1Δ::KANMX, TRP1::10Xmyc-mps1-as1</i> |
